# Supplementary material for: Membrane-Associated Ubiquitin Ligase RNF152 Orchestrates Melanogenesis via Tyrosinase Ubiquitination
Source: Preprints.org preprint supplement (doi:10.20944/preprints202312.0250.v1), 2023-12-05
Supplement: Supplementary file 1 [file supplementary]

## **Supplementary material**

### **Membrane-associated ubiquitin ligase RNF152 orchestrates melanogenesis via tyrosinase ubiquitination**

Ryota Ueda, Rina Hashimoto, Yuki Fujii, José C.J.M.D.S. Menezes, Hirotaka Takahashi,  
Hiroyuki Takeda, Tatsuya Sawasaki, Tomonori Motokawa,  
Kenzo Tokunaga, and Hideaki Fujita

**A**

```

1  metlsqdsll ecqicfnyys prrrpklldc khtccsvclq qmrtsqkdvr cpwergitkl
61  ppgfsvsqqlp ddpevlavia iphtsehtpv fiklpsngcy mlplpisker tllpgdmger
121 llpgsqgksl tvvtipaeqq plgggappea veeepdrrgv vksstwsqvc tvilvacvlv
181 fllgivilhnm sciskrftvi scg

```

**B**

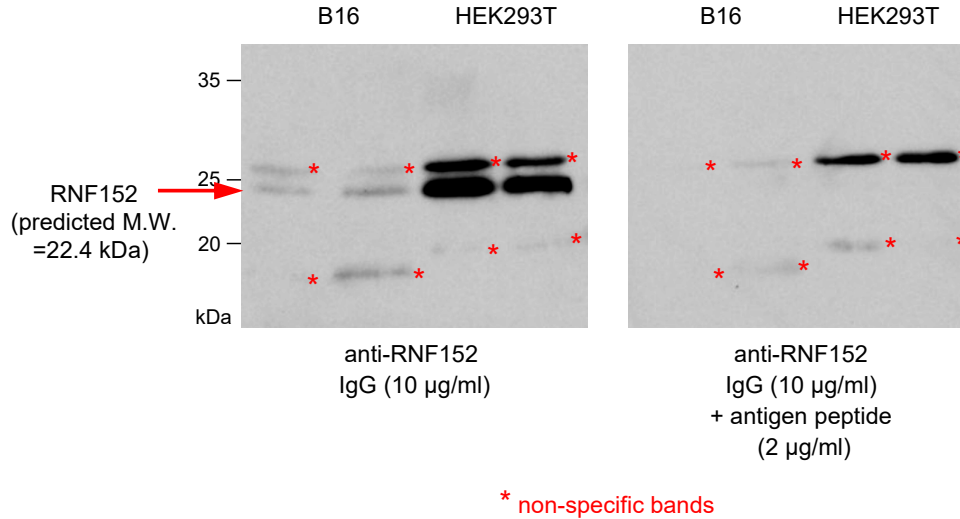

**Figure S1.** Amino acid sequence of RNF152 and evaluation of the antibody to RNF152. **(A)** In the amino acid sequence of mouse RNF152, cysteine residues mutated in C/S mutant are indicated in red font, whereas the transmembrane (TM) domain is highlighted in yellow. The peptide sequence used for rabbit immunization is highlighted in green. **(B)** An affinity purified antibody against synthetic peptide of RNF152 reacted with multiple bands on immunoblots of cell lysates from B16 melanoma and HEK293T cells. Upon the addition of an excess amount of synthetic peptide, only one band close to the predicted molecular weight of RNF152 (22.4 kDa) was reduced, suggesting that this diminished band corresponds to RNF152 (red arrow), while the others are non-specific (red asterisks).
